# Supplementary material
Source: PubMed Central journal article supplement (PMC7354060)
Supplement: NIHMS1601011-supplement-Supporting_Information.pdf [file NIHMS1601011-supplement-Supporting_Information.pdf]

## Supporting Information

### **A bench-top automated sputum-to-genotype system using a Lab-on-a-Film assembly for detection of multidrug-resistant *Mycobacterium tuberculosis***

Alexander V. Kukhtin\*, Ryan Norville\*, Ariel Bueno\*, Peter Qu\*, Nicole Parrish†, Megan Murray‡, Darrell P. Chandler\*, Rebecca C. Holmberg\*, and Christopher G. Cooney\*\*

\* Akonni Biosystems, Inc., 400 Sagner Avenue, Suite 300, Frederick, Maryland, 21701, USA

† Department of Pathology, Johns Hopkins University School of Medicine, Baltimore, Maryland, 21287, USA

‡ Harvard Medical School, Department of Global Health and Social Medicine, Boston, Massachusetts, 02115, USA

\*\* Corresponding author.

S1. Hybridization ratios for all markers for DNA-to-Genotyping tests.

# Supporting Information S1

| Sample                                             |                   | H37Rv         | H37Rv        | TDR-0015      | TDR-0015      | TDR-0018      | TDR-0018      |       |       |       |
|----------------------------------------------------|-------------------|---------------|--------------|---------------|---------------|---------------|---------------|-------|-------|-------|
| Resistance Profile                                 |                   | Wild Type     | Wild Type    | INH Resistant | INH Resistant | RIF Resistant | RIF Resistant |       |       |       |
| Amount                                             |                   | 1 pg          | 1 pg         | 1 pg          | 1 pg          | 1 pg          | 1 pg          |       |       |       |
| <b>RESULTS</b>                                     |                   |               |              |               |               |               |               |       |       |       |
| <b>Final Results</b>                               |                   | Test Validity | VALID        | VALID         | VALID         | VALID         | VALID         |       |       |       |
| M. tuberculosis Complex                            |                   | PRESENT       | PRESENT      | PRESENT       | PRESENT       | PRESENT       | PRESENT       |       |       |       |
| Rifampin Resistance                                |                   | Not Detected  | Not Detected | Not Detected  | Not Detected  | DETECTED      | DETECTED      |       |       |       |
| Isoniazid Resistance                               |                   | Not Detected  | Not Detected | DETECTED      | DETECTED      | Not Detected  | Not Detected  |       |       |       |
| <b>Suspected Mutation</b>                          |                   | rpoB          | N/A          | N/A           | N/A           | N/A           | S531W         |       |       |       |
|                                                    |                   |               |              |               |               |               |               |       |       |       |
|                                                    |                   |               |              |               |               |               |               |       |       |       |
|                                                    |                   | katG          | N/A          | N/A           | S315T (ACC)   | S315T (ACC)   | N/A           |       |       |       |
|                                                    |                   | inhA          | N/A          | N/A           | -15T          | -15T          | N/A           |       |       |       |
| M13 (90, 103, 106)                                 |                   | Absent        | Absent       | Absent        | Absent        | Absent        | Absent        |       |       |       |
| IS6110 (71)                                        |                   | PRESENT       | PRESENT      | PRESENT       | PRESENT       | PRESENT       | PRESENT       |       |       |       |
| rpoB UN (137, 176)                                 |                   | PRESENT       | PRESENT      | PRESENT       | PRESENT       | PRESENT       | PRESENT       |       |       |       |
| katG UN (178)                                      |                   | PRESENT       | PRESENT      | PRESENT       | PRESENT       | PRESENT       | PRESENT       |       |       |       |
| inhA UN (139)                                      |                   | PRESENT       | PRESENT      | PRESENT       | PRESENT       | PRESENT       | PRESENT       |       |       |       |
| rpoB                                               |                   | Not Detected  | Not Detected | Not Detected  | Not Detected  | DETECTED      | DETECTED      |       |       |       |
| katG                                               |                   | Not Detected  | Not Detected | DETECTED      | DETECTED      | Not Detected  | Not Detected  |       |       |       |
| inhA                                               |                   | Not Detected  | Not Detected | DETECTED      | DETECTED      | Not Detected  | Not Detected  |       |       |       |
| <b>Discrimination Ratios (WT - MU) / (WT + MU)</b> |                   |               |              |               |               |               |               |       |       |       |
| Target                                             | Probe Description |               | WT           | MU            |               |               |               |       |       |       |
| rpoB                                               | 507-wt            | 507-DEL       | 1            | 2             | 0.94          | 0.88          | 0.97          | 0.90  | 0.89  | 0.83  |
| rpoB                                               | 510-wt            | Q510H         | 3            | 4             | 0.73          | 0.69          | 0.78          | 0.75  | 0.76  | 0.70  |
| rpoB                                               | 511-wt            | L511P         | 5            | 6             | 0.64          | 0.58          | 0.66          | 0.49  | 0.56  | 0.62  |
| rpoB                                               | 511-wt            | L511R         | 5            | 7             | 0.76          | 0.65          | 0.65          | 0.57  | 0.61  | 0.69  |
| rpoB                                               | 512-wt            | S512T         | 8            | 9             | 0.67          | 0.62          | 0.59          | 0.58  | 0.57  | 0.49  |
| rpoB                                               | 512-wt            | S512R         | 8            | 10            | 0.85          | 0.72          | 0.78          | 0.74  | 0.78  | 0.71  |
| rpoB                                               | 513-wt            | Q513L         | 11           | 12            | 0.90          | 0.95          | 0.96          | 0.88  | 0.96  | 0.99  |
| rpoB                                               | 513-wt            | Q513K         | 11           | 13            | 0.91          | 0.94          | 0.86          | 0.86  | 0.87  | 0.88  |
| rpoB                                               | 513-wt            | Q513P         | 11           | 14            | 0.83          | 0.75          | 0.79          | 0.83  | 0.80  | 0.80  |
| rpoB                                               | 515-wt            | M515I         | 15           | 16            | 0.78          | 0.57          | 0.65          | 0.61  | 0.68  | 0.41  |
| rpoB                                               | 516-wt            | D516E         | 17           | 20            | 0.69          | 0.80          | 0.54          | 0.76  | 1.05  | 0.62  |
| rpoB                                               | 516-wt            | D516Y         | 17           | 23            | 0.50          | 0.24          | 0.65          | 0.41  | 0.53  | 0.36  |
| rpoB                                               | 516-wt            | D516G         | 17           | 24            | 0.69          | 0.54          | 0.25          | 0.81  | 0.83  | 0.50  |
| rpoB                                               | 516-wt            | D516V         | 17           | 25            | 0.56          | 0.53          | 0.65          | 0.60  | 0.14  | 0.54  |
| rpoB                                               | 522-wt            | S522L         | 26           | 28            | 0.79          | 0.86          | 0.91          | 0.83  | 0.84  | 0.77  |
| rpoB                                               | 524-wt            | L524S         | 29           | 30            | 0.87          | 1.05          | 0.92          | 0.92  | 0.84  | 0.83  |
| rpoB                                               | 526-wt            | H526D         | 31           | 32            | 0.87          | 0.83          | 0.83          | 0.85  | 0.87  | 0.90  |
| rpoB                                               | 526-wt            | H526R         | 31           | 34            | 0.92          | 0.93          | 0.87          | 0.84  | 0.97  | 0.93  |
| rpoB                                               | 526-wt            | H526L         | 31           | 35            | 0.90          | 0.92          | 0.85          | 0.86  | 0.91  | 0.89  |
| rpoB                                               | 526-wt            | H526Q (CAA)   | 31           | 36            | 0.89          | 1.00          | 0.99          | 0.86  | 0.97  | 0.98  |
| rpoB                                               | 526-wt            | H526Q (CAG)   | 31           | 37            | 0.95          | 0.98          | 0.90          | 0.94  | 0.96  | 0.98  |
| rpoB                                               | 526-wt            | H526C         | 31           | 38            | 0.97          | 0.98          | 0.89          | 0.93  | 0.96  | 0.98  |
| rpoB                                               | 526-wt            | H526N         | 31           | 39            | 0.91          | 0.92          | 0.92          | 0.94  | 0.97  | 0.95  |
| rpoB                                               | 526-wt            | H526P         | 31           | 41            | 0.75          | 0.82          | 0.83          | 0.87  | 0.90  | 0.84  |
| rpoB                                               | 526-wt            | H526Y         | 31           | 43            | 0.57          | 0.58          | 0.60          | 0.62  | 0.74  | 0.71  |
| rpoB                                               | 531-wt            | S531W         | 44           | 46            | 0.74          | 0.85          | 0.65          | 0.77  | -0.96 | -0.92 |
| rpoB                                               | 531-wt            | S531L         | 44           | 47            | 0.74          | 0.56          | 0.89          | 0.72  | -0.42 | -0.20 |
| rpoB                                               | 531-wt            | S531Q         | 44           | 48            | 0.86          | 1.08          | 0.93          | 0.99  | 0.76  | 0.47  |
| rpoB                                               | 531-wt            | S531C         | 44           | 50            | 0.61          | 0.75          | 0.56          | 0.56  | -0.89 | -0.79 |
| rpoB                                               | 533-wt            | L533P         | 51           | 52            | 0.83          | 0.79          | 0.75          | 0.76  | 1.18  | 0.78  |
| katG                                               | 315-wt            | S315T (ACC)   | 59           | 63            | 0.94          | 0.91          | -0.79         | -0.48 | 0.93  | 0.90  |
| katG                                               | 315-wt            | S315T (ACA)   | 59           | 78            | 0.93          | 0.92          | -0.15         | 0.30  | 0.93  | 0.91  |
| katG                                               | 315-wt            | S315N         | 59           | 79            | 0.95          | 0.90          | 0.14          | 0.57  | 0.92  | 0.89  |
| inhA                                               | -8T-wt            | -8A           | 82           | 83            | 0.82          | 0.82          | 0.50          | 0.63  | 0.90  | 0.85  |
| inhA                                               | -8T-wt            | -8C           | 82           | 84            | 0.74          | 0.71          | 0.59          | 0.54  | 0.77  | 0.75  |
| inhA                                               | -15C-wt           | -15T          | 85           | 86            | 0.94          | 0.92          | -0.58         | -0.49 | 0.97  | 0.95  |
| inhA                                               | -17G-wt           | -17T          | 87           | 88            | 0.79          | 0.79          | 0.79          | 0.84  | 0.87  | 0.82  |

Ratios in black are called wild-type.

Ratios in red are called mutants.

Ratios in gray are not called in deference to more negative ratio in the same grouping.
